# Supplementary material for: Nonlinear transport behaviors in anti-aromatic cyclo[n]carbon-based (n = 4k) molecular devices
Source: Royal Society of Chemistry journal article supplement (doi:10.1039/d4tc04033c), 2025-01-01
Supplement: d4tc04033c1.pdf [file d4tc04033c1.pdf]

## Supporting Information

# Nonlinear Transport Behaviors in Anti-aromatic Cyclo[n]carbon-based ( $n = 4k$ ) Molecular Devices

*Junnan Guo<sup>1</sup>, Wenhui Fang<sup>1</sup>, Jian Huang<sup>1</sup>, Lishu Zhang<sup>2</sup>, Weikang Wu<sup>1†</sup>, and Hui*

*Li<sup>1\*</sup>*

<sup>1</sup>Key Laboratory for Liquid-Solid Structural Evolution and Processing of Materials,

Ministry of Education, Shandong University, Jinan 250061, China

<sup>2</sup>Peter Grünberg Institut (PGI-1) and Institute for Advanced Simulation (IAS-1),

Forschungszentrum Jülich, Jülich 52428, Germany

†E-mail: [weikang\\_wu@sdu.edu.cn](mailto:weikang_wu@sdu.edu.cn)

\*E-mail: [lihuilmy@hotmail.com](mailto:lihuilmy@hotmail.com)

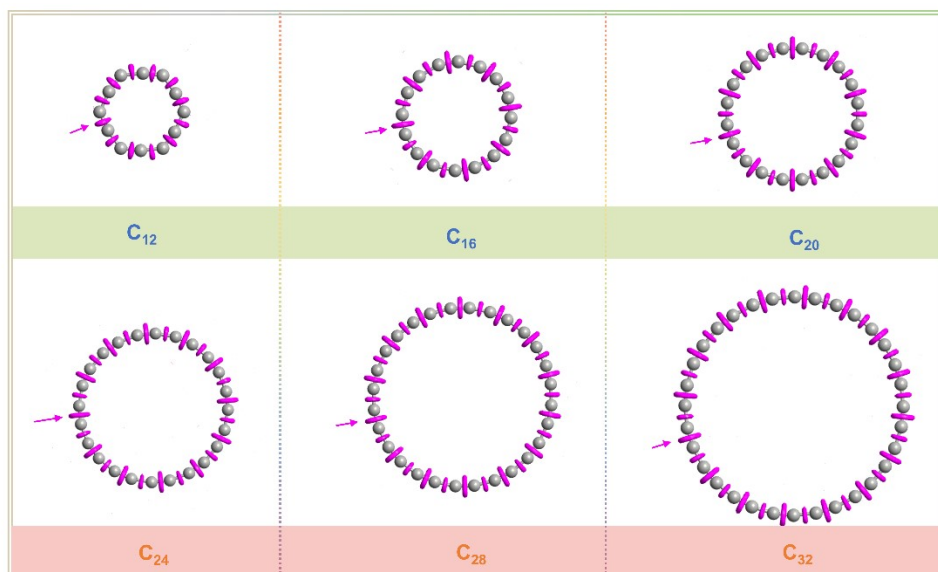

**Figure S1.** Electron localization function (ELF) (isovalue = 0.94 au) of C<sub>n</sub>. Short C-C bonds in each map are highlighted by an arrow.

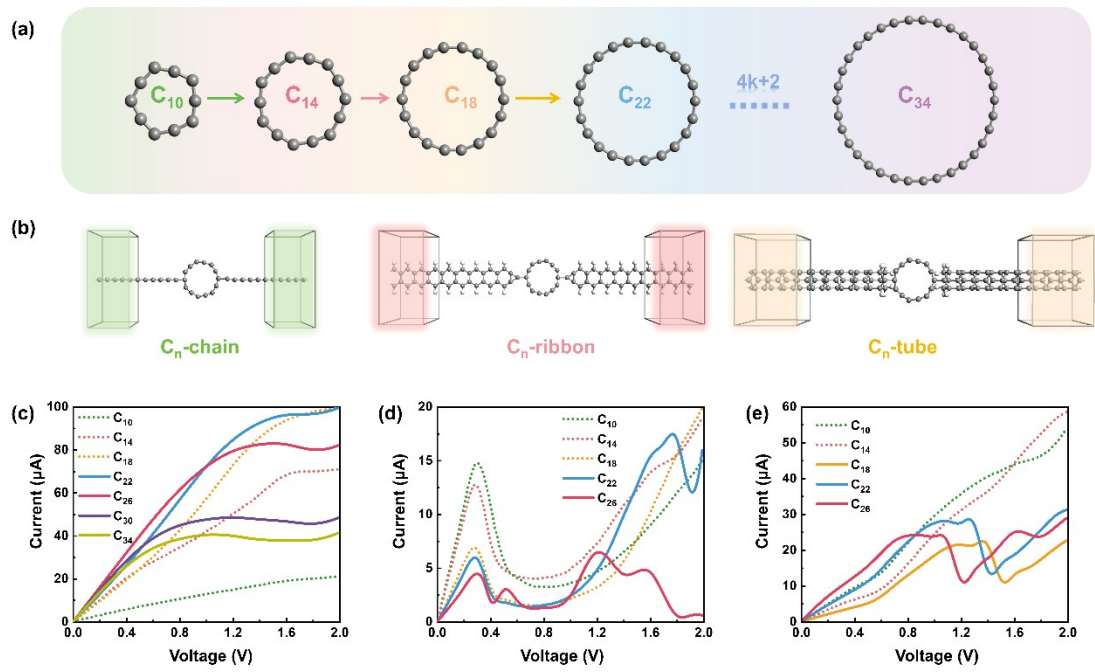

**Figure S2.** (a) Structures of C<sub>n</sub> (n from 10 to 34). (b) Device configurations of C<sub>n</sub>-chain, C<sub>n</sub>-ribbon, and C<sub>n</sub>-tube. I-V curves of C<sub>n</sub>-chain (c), C<sub>n</sub>-ribbon (d), and C<sub>n</sub>-tube (e).

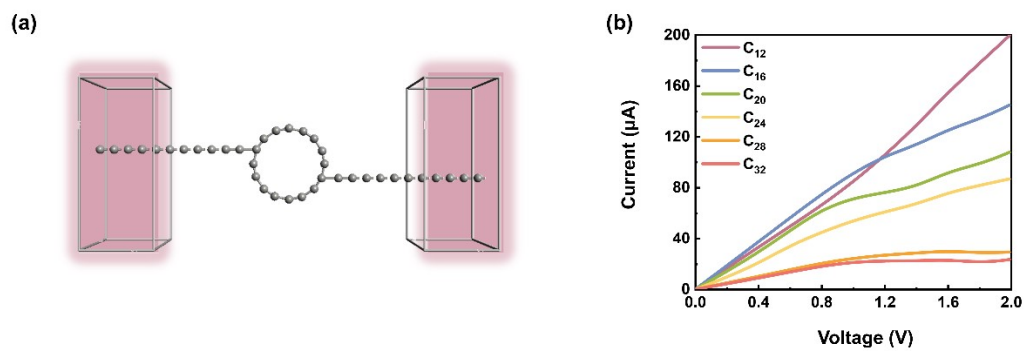

**Figure S3.** (a) Other device configurations of  $C_n$ -chain. (b) I-V curves of  $C_n$ -chain

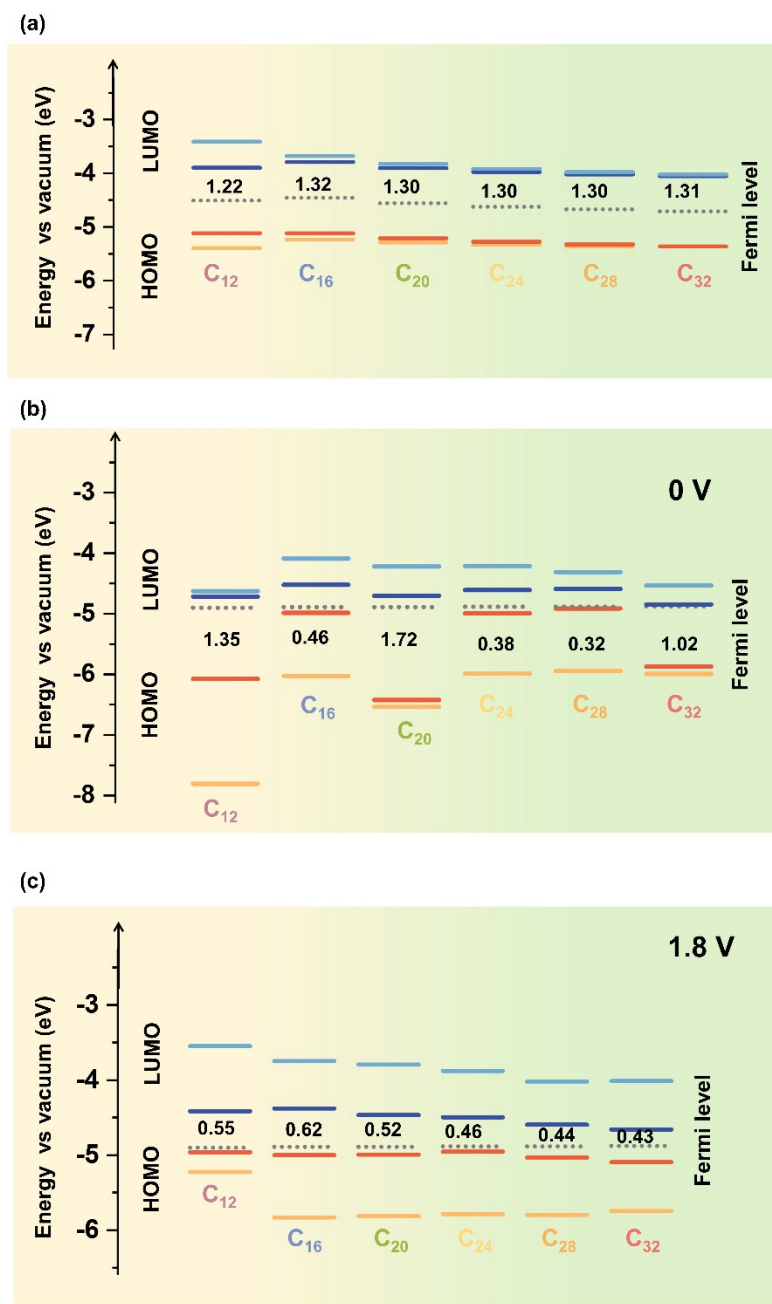

**Figure S4.** (a) Frontier molecular orbitals energies of  $C_n$ . (b) Frontier molecular orbitals energies of  $C_n$  at 0 V bias after device construction. (c) Frontier molecular orbitals energies of  $C_n$  at 1.8 V bias after device construction.

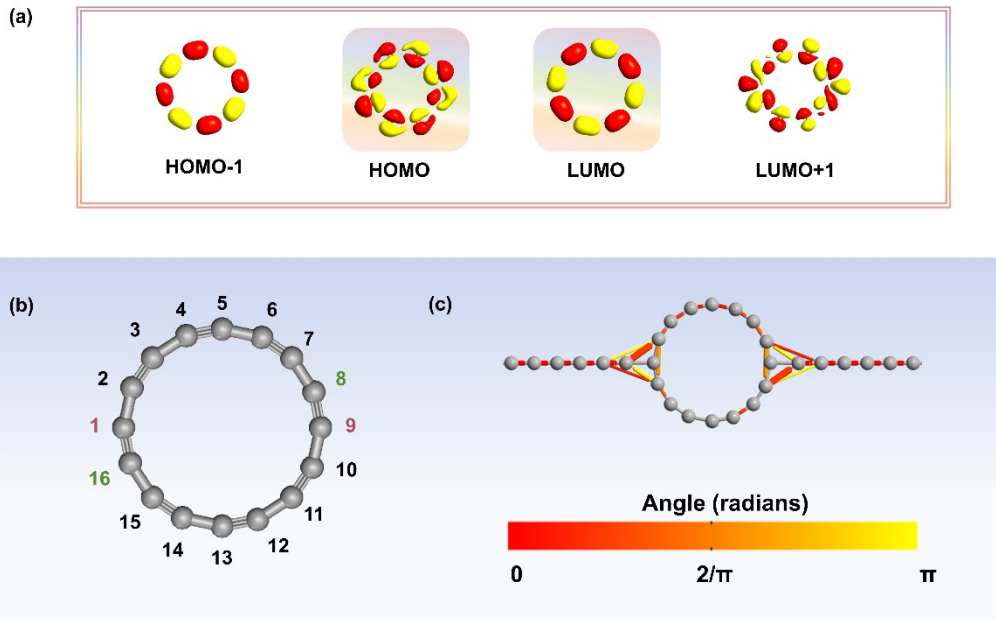

**Figure S5.** (a) Molecular projected self-consistent Hamiltonian quantities (MPSH) around the Fermi energy level of  $C_{16}$ -chain. (b) Numbers of atoms in  $C_{16}$  (c) Transmission pathways of  $C_{16}$ -chain.

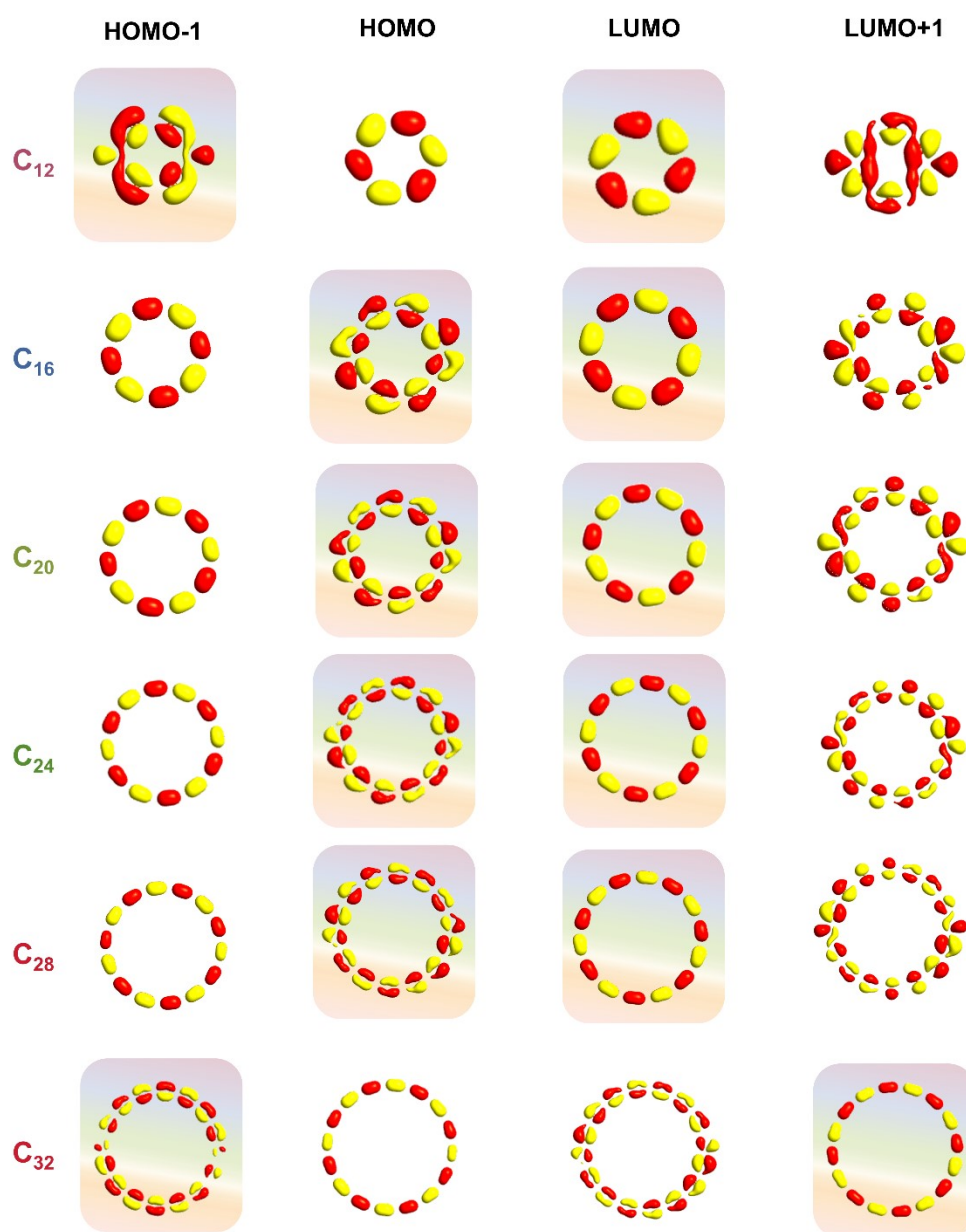

**Figure S6.** Molecular projected self-consistent Hamiltonian quantities (MPSH) around the Fermi energy level of  $C_n$ -chain. The dark shaded region is the dominant molecular orbital.

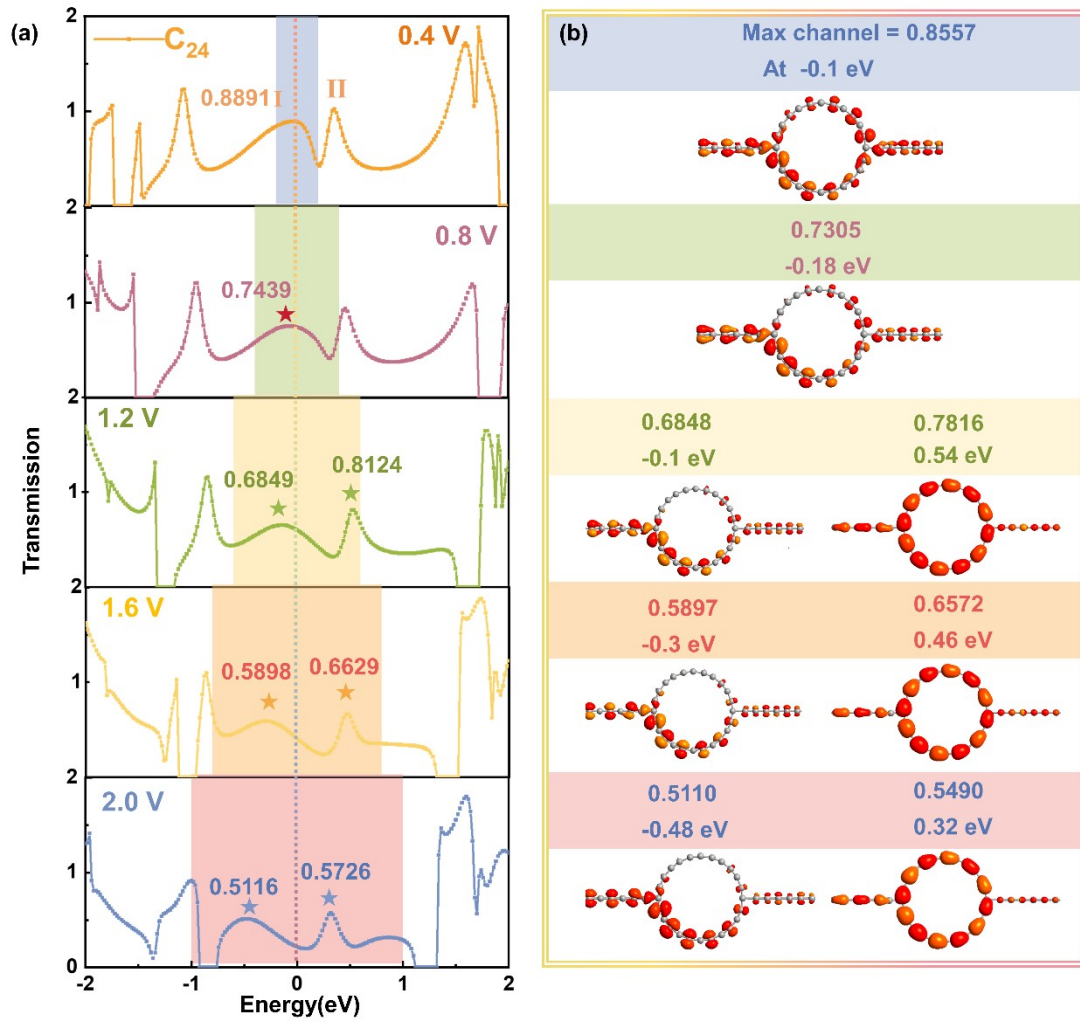

**Figure S7.** (a) Transmission spectra of device  $C_{24}$ -chain at typical biases. (b) Maximum transmission eigenvalues and transmission eigenstates of peaks I and II at corresponding biases.



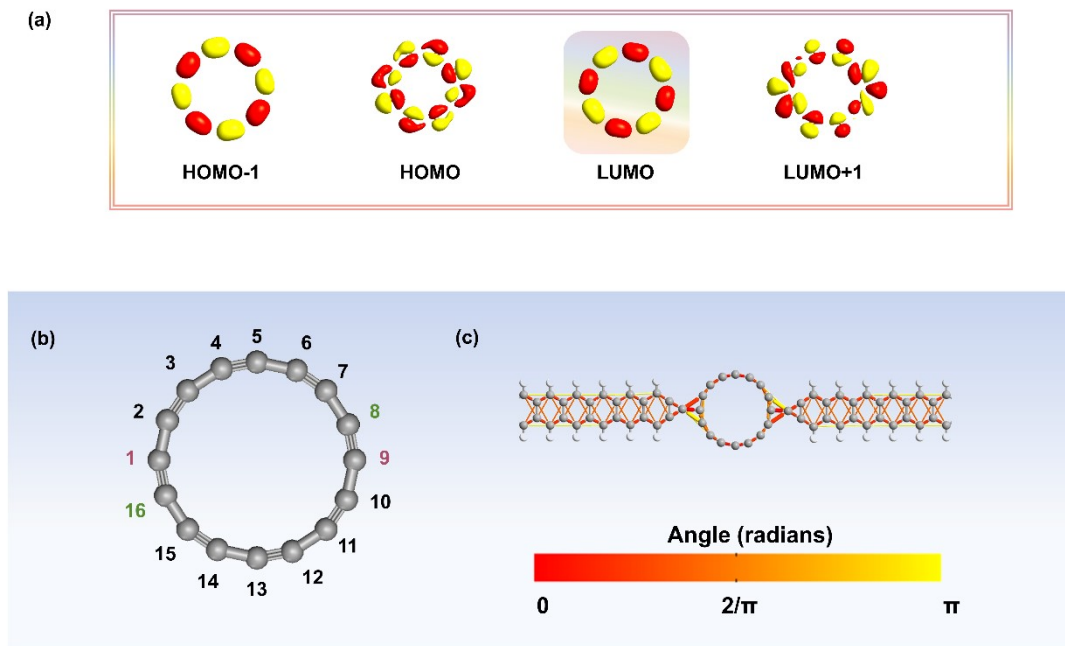

**Figure S8.** (a) Molecular projected self-consistent Hamiltonian quantities (MPSH) around the Fermi energy level of  $C_{16}$ -ribbon. (b) Numbers of atoms in  $C_{16}$ . (c) Transmission pathways of  $C_{16}$ -ribbon.

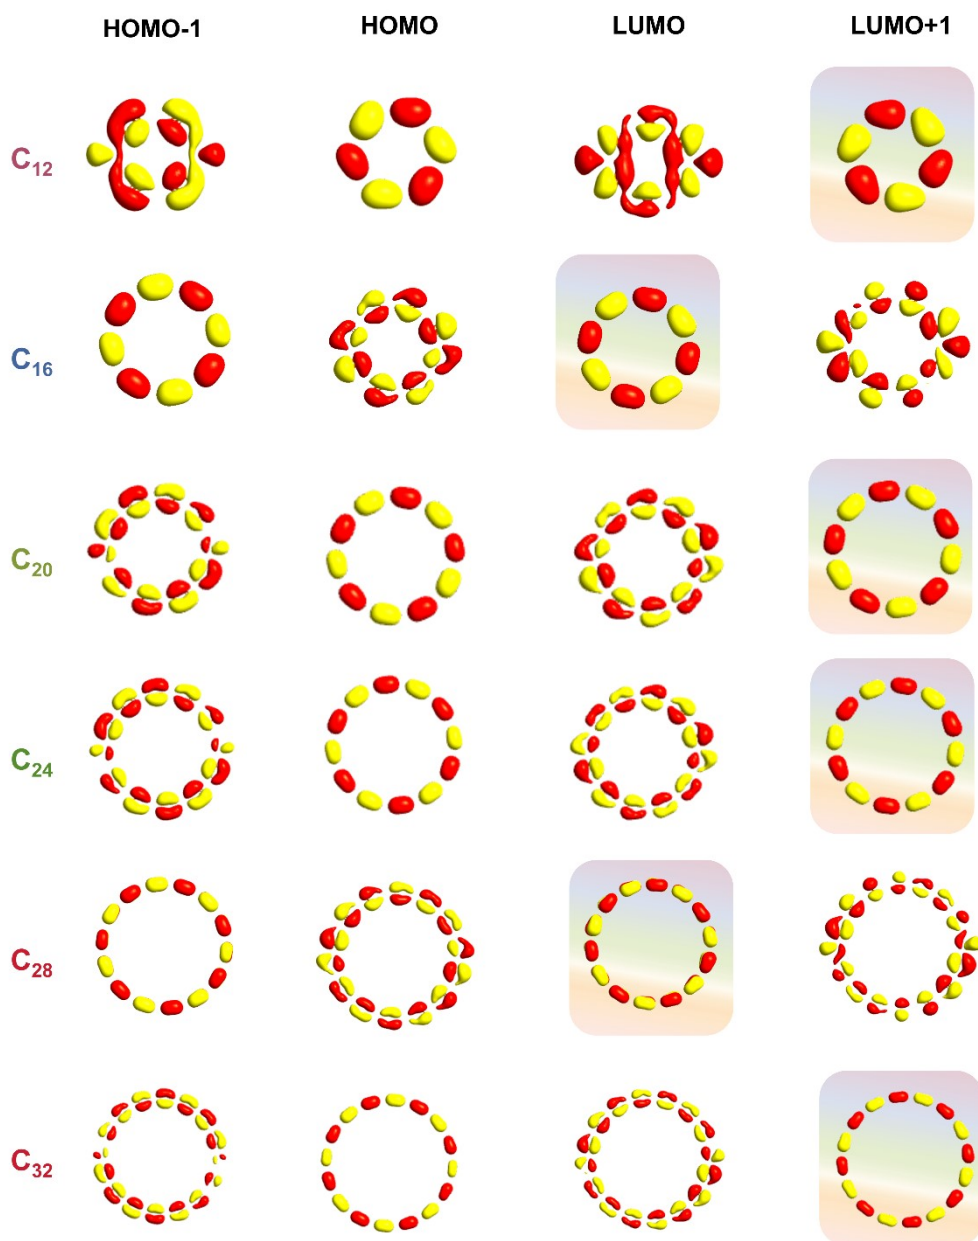

**Figure S9.** Molecular projected self-consistent Hamiltonian quantities (MPSH) around the Fermi energy level of  $C_n$ -ribbon. The dark shaded region is the dominant molecular orbital.

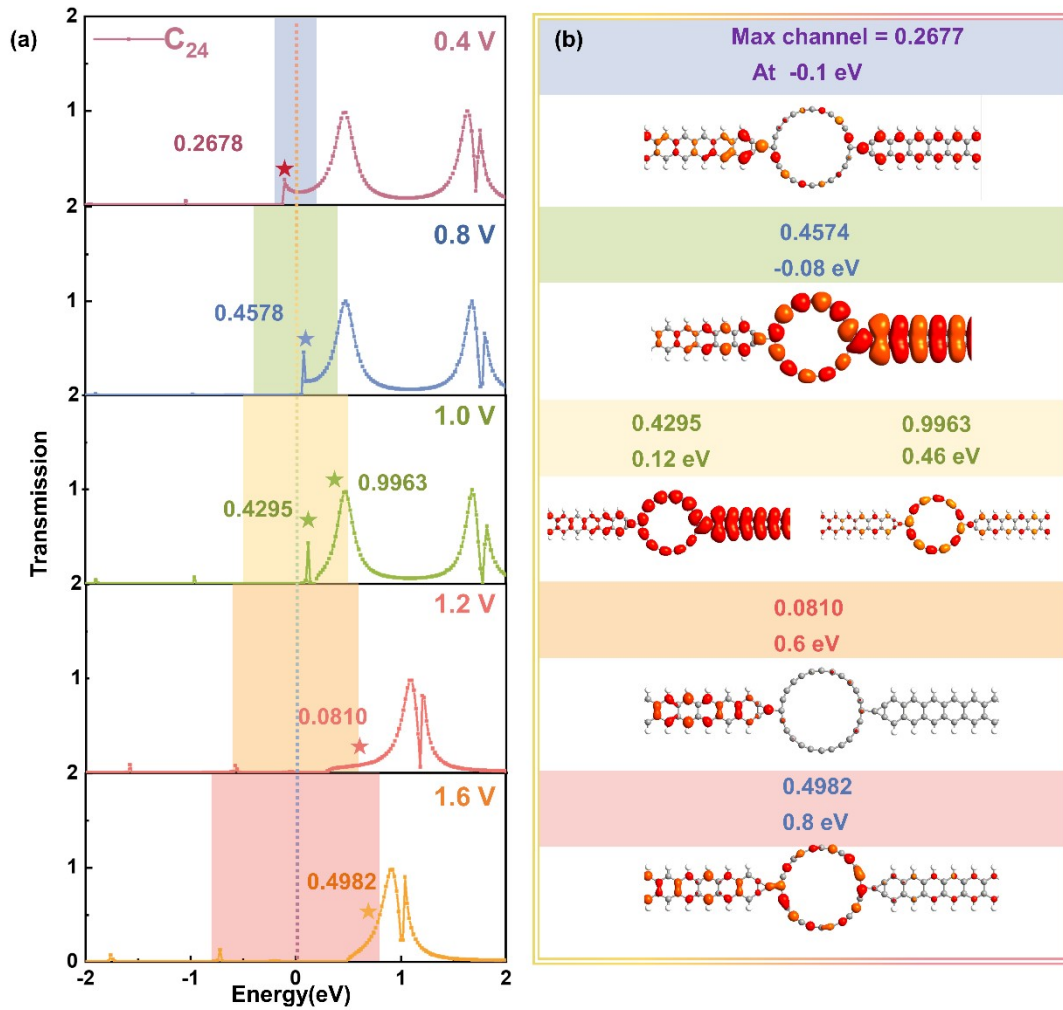

**Figure S10.** (a) Transmission spectra of device  $C_{24}$ -ribbon at typical biases. (b) Maximum transmission eigenvalues and transmission eigenstates of peaks I and II at corresponding biases.

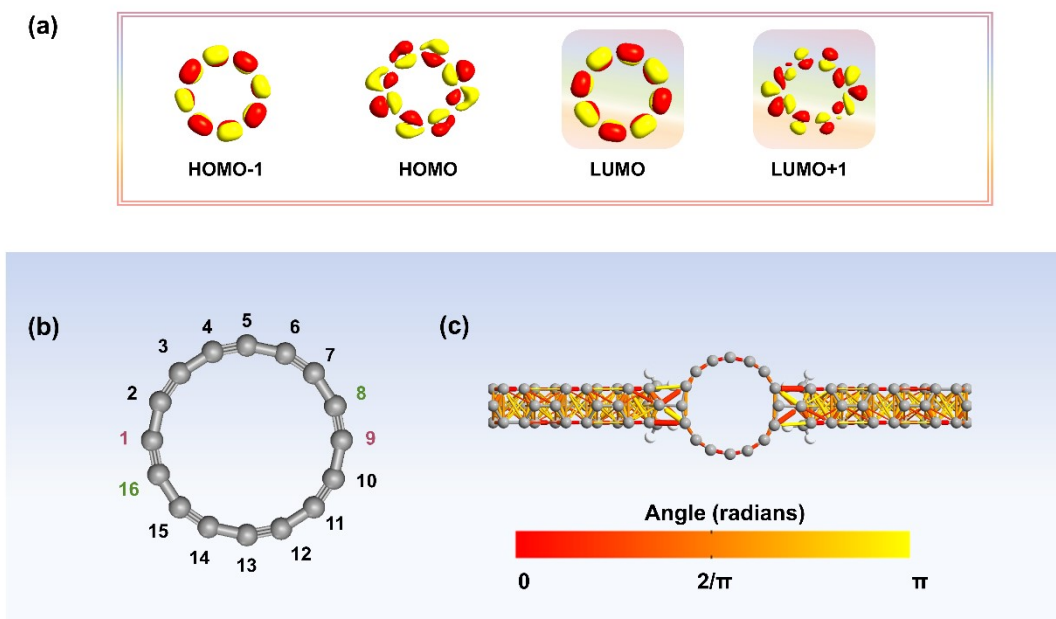

**Figure S11.** (a) Molecular projected self-consistent Hamiltonian quantities (MPSH) around the Fermi energy level of  $C_{16}$ -tube. (b) Numbers of atoms in  $C_{16}$ . (c) Transmission pathways of  $C_{16}$ -tube.

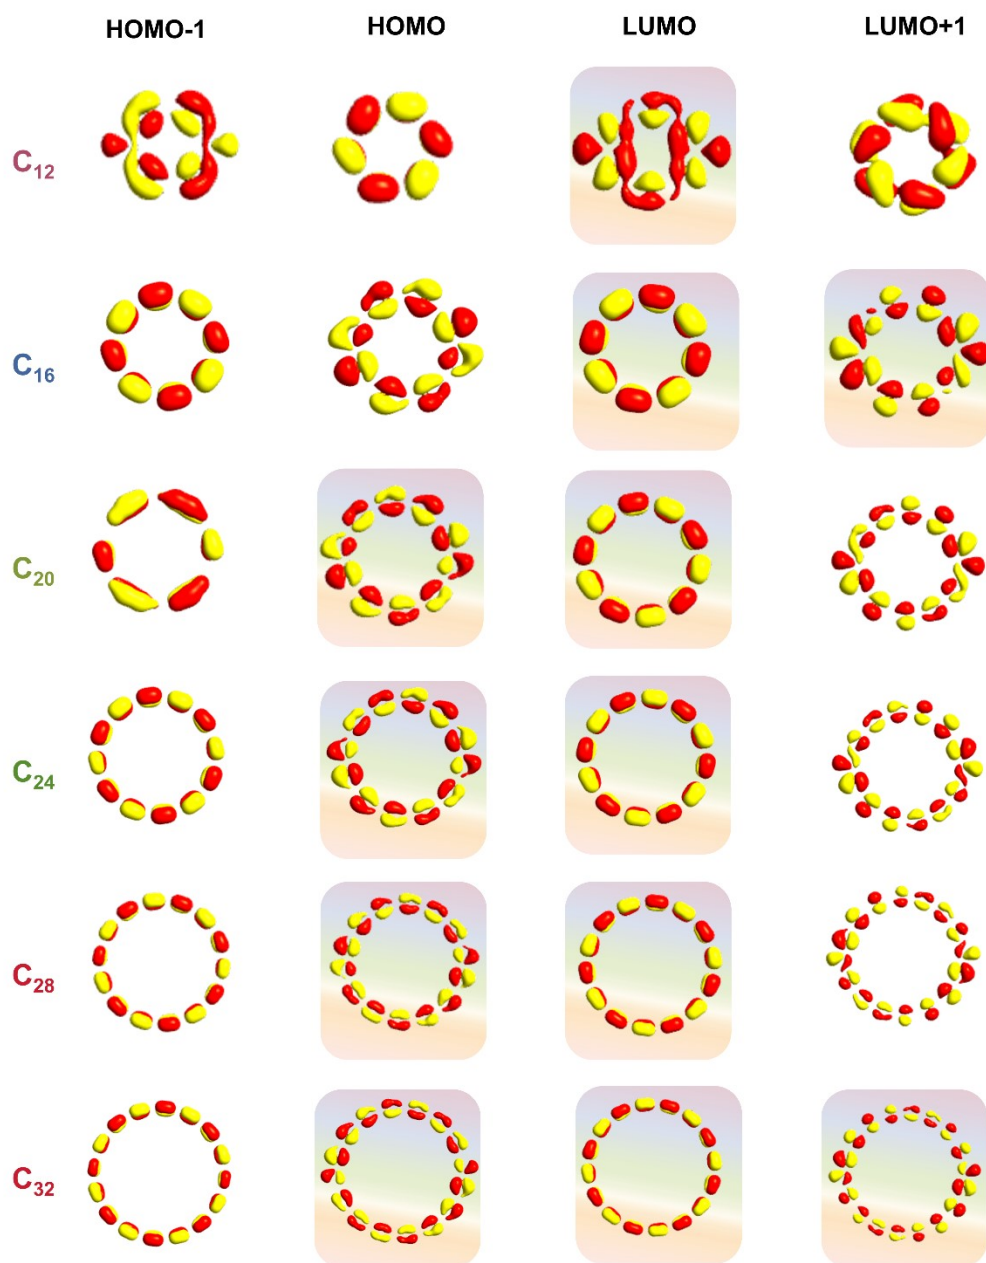

**Figure S12.** Molecular projected self-consistent Hamiltonian quantities (MPSH) around the Fermi energy level of  $C_n$ -tube. The dark shaded region is the dominant molecular orbital.

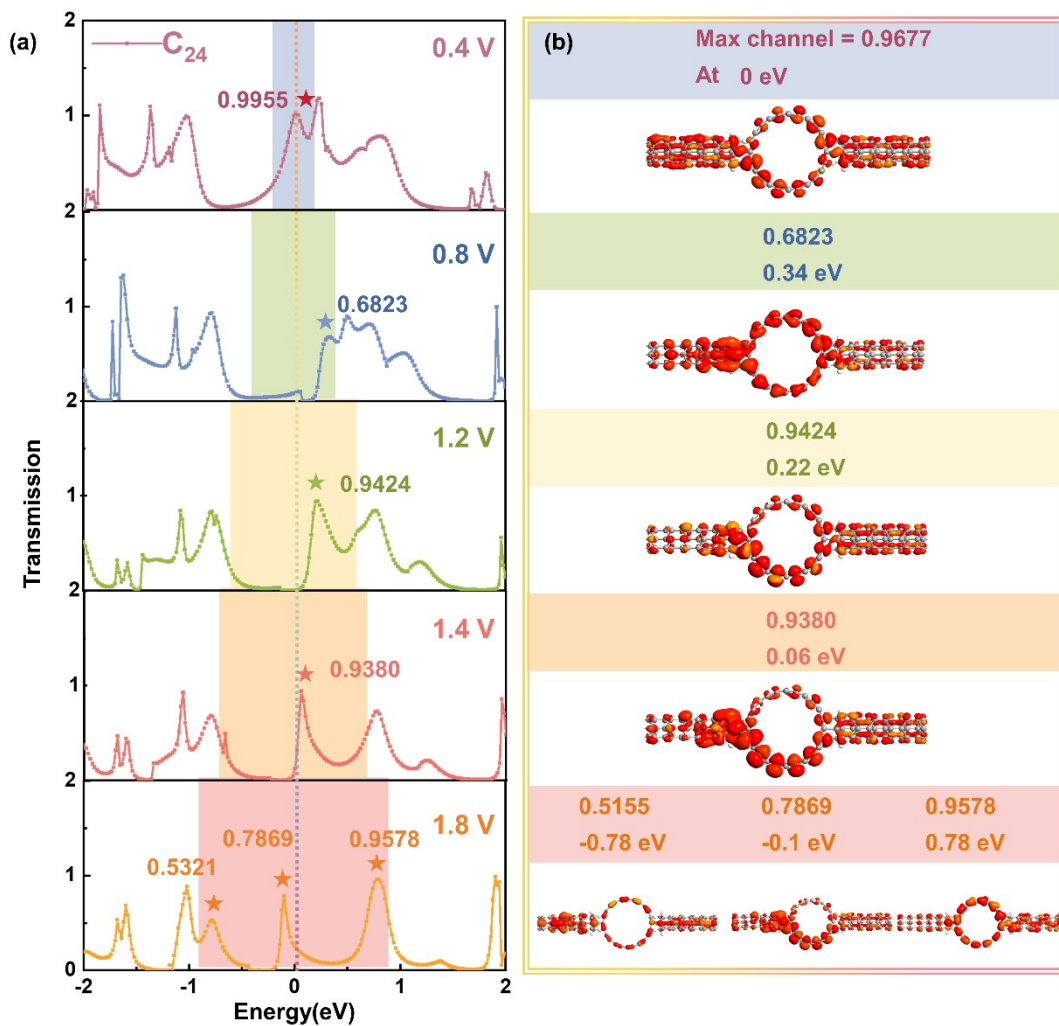

**Figure S13.** (a) Transmission spectra of device  $C_{24}$ -tube at typical biases. (b) Maximum transmission eigenvalues and transmission eigenstates of peaks I and II at corresponding biases.

**Table S1.** Performance comparison with other molecular-based devices

| Molecule                                       | Electrode           | Bias voltage (V) | Current order of magnitude | $I_{\max}$ | Key characteristics           | NDR Peak-to-Valley Ratio (PVR) |
|------------------------------------------------|---------------------|------------------|----------------------------|------------|-------------------------------|--------------------------------|
| Cyclo[18]carbon <sup>1</sup>                   | carbon chain        | [0, 1]           | $\mu\text{A}$              | $\sim 50$  | Ohmic characteristic          | —                              |
| Cyclo[18]carbon <sup>1</sup>                   | graphene            | [0, 1]           | $\mu\text{A}$              | $\sim 10$  | Quasi Schottky                | —                              |
| Cyclo[18]carbon <sup>1</sup>                   | silver              | [0, 1]           | $\mu\text{A}$              | $\sim 8$   | Current-limiting              | —                              |
| Cyclo[14]carbon <sup>2</sup> (polyyinic)       | graphene            | [0, 1]           | $\mu\text{A}$              | $\sim 15$  | NDR effect                    | $\sim 1.4$                     |
| Cyclo[14]carbon <sup>2</sup> (cumulenic)       | graphene            | [0, 1]           | $\mu\text{A}$              | $\sim 20$  | Current-limiting              | —                              |
| Trefoil knot <sup>3</sup> (24 benzenes)        | silver              | [0, 2]           | nA                         | $\sim 80$  | NDR effect                    | $\sim 1.7$                     |
| Cyclopropyllithium derivative <sup>4</sup>     | carbon chain        | [0, 3.5]         | nA                         | $\sim 90$  | NDR effect                    | $\sim 6.1$                     |
| Biphenyl <sup>5</sup>                          | gold                | [0, 2]           | $\mu\text{A}$              | $\sim 10$  | NDR effect                    | $\sim 1.1$                     |
| Phenylpyridine <sup>5</sup>                    | gold                | [0, 2]           | $\mu\text{A}$              | $\sim 10$  | Nonlinearity                  | —                              |
| Thiophene Benzene-Based molecules <sup>6</sup> | graphene nanoribbon | [-2, 2]          | $\mu\text{A}$              | $\sim 20$  | Rectification; NDR effect     | $\sim 3.0$                     |
| Cyclo[n]carbon (Anti-aromatic)                 | carbon chain        | [0, 2]           | $\mu\text{A}$              | $\sim 90$  | NDR effect; Current-limiting  | $\sim 1.2$                     |
| Cyclo[n]carbon (Anti-aromatic)                 | graphene nanoribbon | [0, 2]           | $\mu\text{A}$              | $\sim 25$  | NDR effect; Multi-NDR effect  | $\sim 9.7$                     |
| Cyclo[n]carbon (Anti-aromatic)                 | nanotube            | [0, 2]           | $\mu\text{A}$              | $\sim 65$  | Multi-NDR effect; Oscillation | $\sim 1.9$                     |

**References**

1. L. Zhang, H. Li, Y. P. Feng and L. Shen, *J. Phys. Chem. Lett.*, 2020, **11**, 2611-2617.
2. Y. Liu, Z. Fang, B. Yao, J. Zhu, G. Tian and L. Ma, *Appl. Phys. Lett.*, 2025, **126**.
3. L. Zhu, Y. D. Guo, H. L. Zeng, H. X. Da, J. F. Li, Z. C. Liang, Y. Y. Jiang and X. H. Yan, *Phys. Lett. A*, 2021, **410**, 127539.
4. Y. D. Guo, P.-Y. Huang, X. X. Min, L.Y. Lin, M. Q. Rao, C. J. Dai, J. H. Li, P. Chen and X. H. Yan, *Phys. B: Condens. Matter*, 2022, **639**, 413989.

5. G. Berdiyurov and H. Hamoudi, *J. Mater. Res. Technol.*, 2021, **12**, 193-201.
6. Y. Xia, X. Zhang, C. Yuan, L. Zhang, X. Dai, T. Li, C. Fu and H. Li, *J. Phys. Chem. C*, 2019, **123**, 2766-2774.
